# Supplementary material
Source: PubMed Central journal article supplement (PMC3809607)
Supplement: Supp_Fig1.pdf [file Supp_Fig1.pdf]

## Supplementary Data

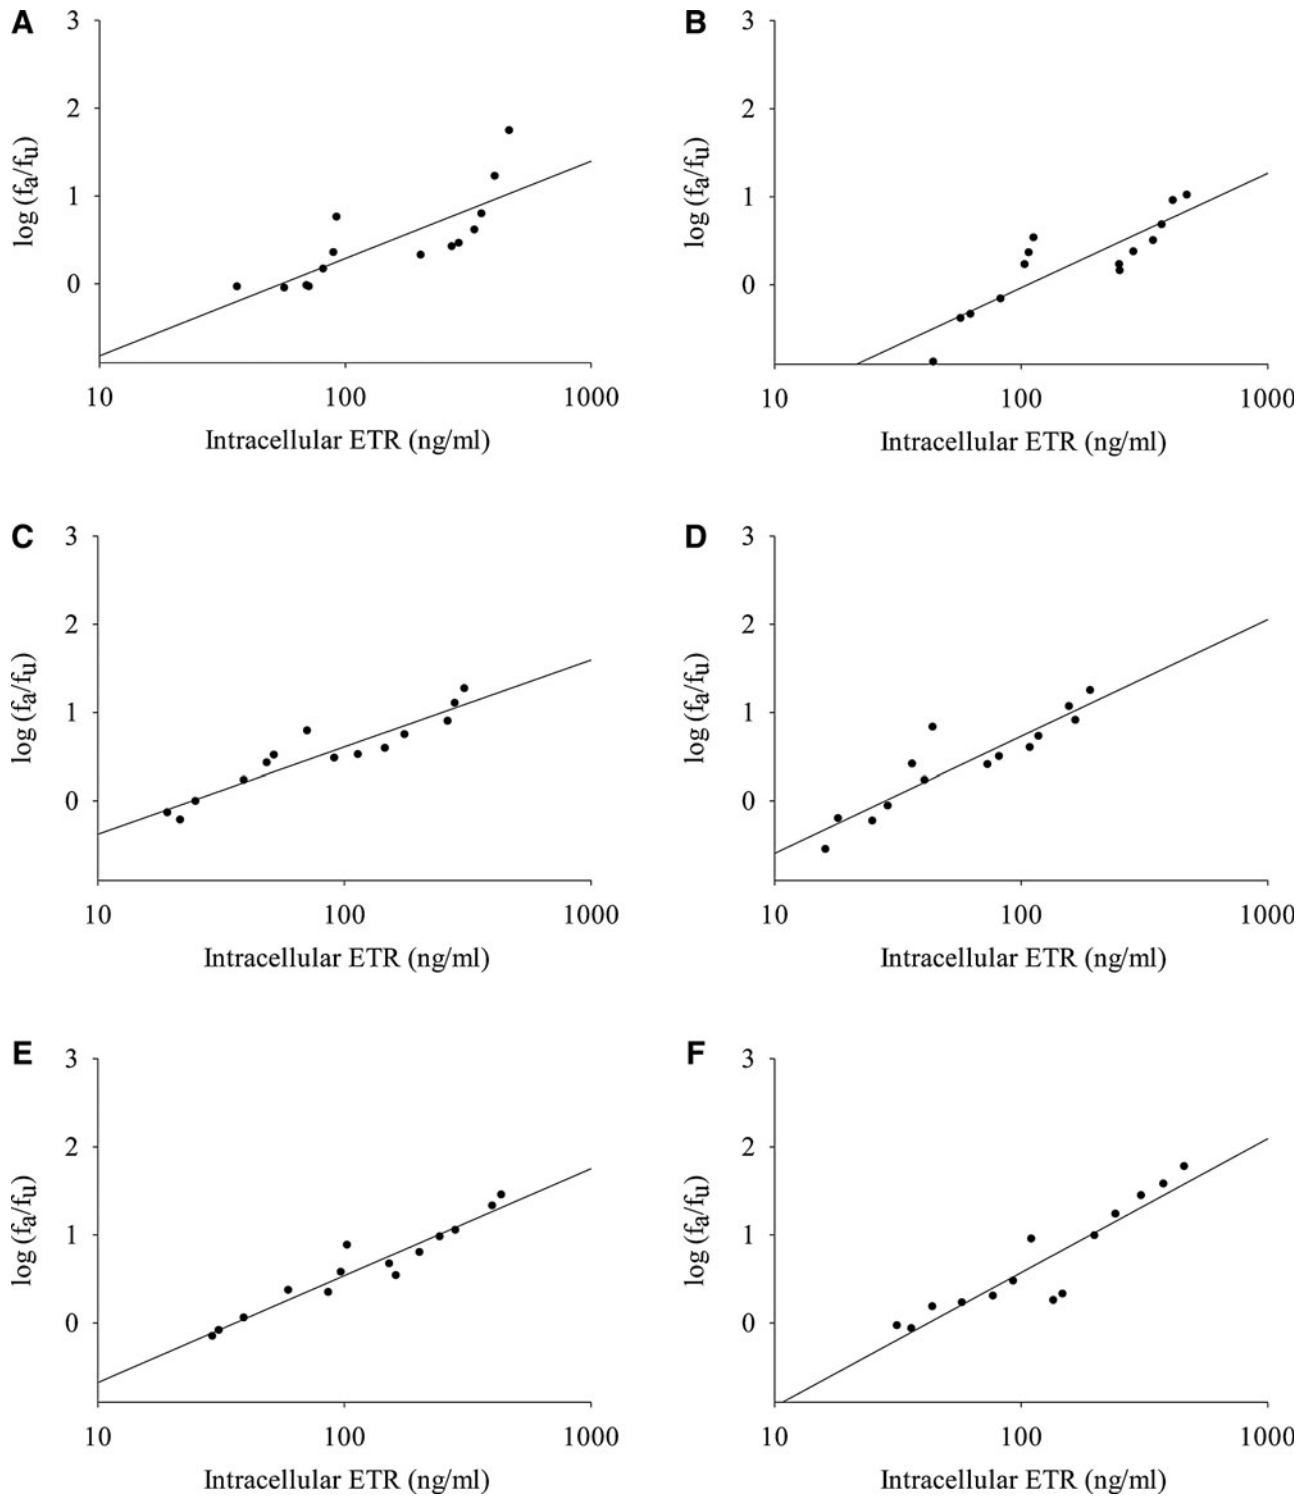

**SUPPLEMENTARY FIG. S1.** The impact of intracellular ETR on antiviral effect. The intracellular ARV concentrations and relative impact on antiviral effect were assessed using a median-effect model. (A–F) The intracellular dose-response relationship for six individual subjects CD4<sup>+</sup> T cells following dosing with ETR. Response is measured as the  $\log_{10}$  of the fraction of virus affected by drug divided by the fraction of virus unaffected by drug ( $f_a/f_u$ ).
